# Supplementary material for: The Role of Diet during Pregnancy in Protecting against Gestational Diabetes Mellitus in a Population with Mediterranean Dietary Habits: A Cross-Sectional Study
Source: MDPI journal article supplement (doi:10.3390/jcm12051857), 2023-02-26
Supplement: s1 [file s1]

**Table S1.** Maternal dietary habits during pregnancy

|                                                              |                  | N(%)       |  |
|--------------------------------------------------------------|------------------|------------|--|
| <b>Semi-quantitative Data</b>                                |                  |            |  |
| Daily frequency of carbohydrates-rich meals consumption n(%) | None             | 2 (1.0)    |  |
|                                                              | 1 time / day     | 53 (27.5)  |  |
|                                                              | 2 times / day    | 86 (44.6)  |  |
|                                                              | 3 times / day    | 41 (21.2)  |  |
|                                                              | 4 times / day    | 9 (4.7)    |  |
|                                                              | 5 times / day    | 2 (1.0)    |  |
| Frequency of sweets consumption n(%)                         | None             | 18 (9.3)   |  |
|                                                              | 1 time / week    | 29 (15.0)  |  |
|                                                              | 2 times / week   | 37 (19.2)  |  |
|                                                              | 3-4 times / week | 54 (28.0)  |  |
|                                                              | 1 time / day     | 36 (18.7)  |  |
|                                                              | 2 times / day    | 19 (9.8)   |  |
| Daily frequency of fruits and vegetables consumption n(%)    | None             | 3 (1.6)    |  |
|                                                              | 1 time / day     | 33 (17.1)  |  |
|                                                              | 2 times / day    | 74 (38.3)  |  |
|                                                              | 3 times / day    | 45 (23.3)  |  |
|                                                              | 4 times / day    | 28 (14.5)  |  |
|                                                              | 5 times / day    | 10 (5.2)   |  |
| Frequency of soft drinks consumption n(%)                    | None             | 136 (70.8) |  |
|                                                              | 3 times / week   | 33 (17.2)  |  |
|                                                              | 1 time / day     | 20 (10.4)  |  |
|                                                              | 2-3 times / day  | 3 (1.6)    |  |
| Frequency of coffee consumption n(%)                         | None             | 77 (39.9)  |  |
|                                                              | 3 times / week   | 27 (14.0)  |  |
|                                                              | 1 time / day     | 76 (39.4)  |  |
|                                                              | 2-3 times / day  | 11 (5.7)   |  |
|                                                              | 4-5 times / day  | 2 (1.0)    |  |
| <b>Qualitative Data</b>                                      |                  |            |  |
| Frequent consumption of cereals n(%)                         | No               | 60 (31.1)  |  |
|                                                              | Yes              | 133 (68.9) |  |
| Frequent consumption of rice n(%)                            | No               | 59 (30.6)  |  |
|                                                              | Yes              | 134 (69.4) |  |
| Frequent consumption of pasta n(%)                           | No               | 35 (18.1)  |  |
|                                                              | Yes              | 158 (81.9) |  |
| Frequent consumption of bread and crackers n(%)              | No               | 64 (33.2)  |  |
|                                                              | Yes              | 129 (66.8) |  |
| Frequent consumption of potatoes n(%)                        | No               | 56 (29.0)  |  |

|                                      |     |               |  |
|--------------------------------------|-----|---------------|--|
|                                      | Yes | 137<br>(71.0) |  |
| Frequent consumption of lentils n(%) | No  | 62 (32.1)     |  |
|                                      | Yes | 131<br>(67.9) |  |
| Frequent consumption of tea n(%)     | No  | 154<br>(79.8) |  |
|                                      | Yes | 39 (20.2)     |  |
| Frequent consumption of juices n(%)  | No  | 53 (27.5)     |  |
|                                      | Yes | 140<br>(72.5) |  |
|                                      |     |               |  |
| Total Sample Size                    |     | 193           |  |

**Table S2.** Odds ratios and 95% confidence intervals from crude and adjusted logistic regression analyses for fruits and vegetables consumption during pregnancy

|                                                      | Crude Analysis    |            |                          |          |
|------------------------------------------------------|-------------------|------------|--------------------------|----------|
|                                                      |                   | Odds Ratio | 95% confidence intervals |          |
| Daily frequency of fruits and vegetables consumption | None              | Reference  | -                        | -        |
|                                                      | 1 time / day      | 0,13       | 0,01                     | 2,11     |
|                                                      | 2 times / day     | 0,08       | 0,01                     | 1,21     |
|                                                      | 3 times / day     | 0,05       | 0,00                     | 1,02     |
|                                                      | 4 times / day     | 0,43       | 0,03                     | 5,78     |
|                                                      | 5 times / day     | 0,00       | 0,00                     | Infinity |
|                                                      | Adjusted Analysis |            |                          |          |
| Daily frequency of fruits and vegetables consumption | None              | Reference  | -                        | -        |
|                                                      | 1 time / day      | 0,03       | 0,00                     | 0,90     |
|                                                      | 2 times / day     | 0,02       | 0,00                     | 0,46     |
|                                                      | 3 times / day     | 0,01       | 0,00                     | 0,47     |
|                                                      | 4 times / day     | 0,11       | 0,00                     | 2,66     |
|                                                      | 5 times / day     | 0,00       | 0,00                     | Infinity |
|                                                      |                   |            |                          |          |
